# Supplementary material
Source: PubMed Central journal article supplement (PMC8711088)
Supplement: NIHMS1764888-supplement-1.pdf [file NIHMS1764888-supplement-1.pdf]

125  
126  
127  
128  
129  
130  
131  
132  
133  
134  
135  
136  
137  
138  
139  
140  
141  
142  
143  
144  
145  
146  
147  
148  
149  
150  
151  
152  
153  
154  
155  
156  
157  
158  
159  
160  
161  
162  
163

**Supplementary Data**

**Data S1.** Table S1 and experimental procedures. Table S1. Location and number of thioredoxin system-related genes and genes in the Calvin–Benson cycle (CB) and oxidative pentose phosphate pathway (OPPP) in different photosynthetic organisms (*Synechocystis* sp. PCC 6803, *Cyanidioschyzon merolae*, *Arabidopsis thaliana*, *Paulinella micropora* KR01).

**Data S2.** (A) Phylogeny of thioredoxin (TRX) in KR01. (B) Phylogeny of glucose-6-phosphate dehydrogenase (G6PDH) in KR01 and sequence alignment of redox-active Cys region of chloroplastic G6PDH. Asterisk indicate redox-active Cys sites. (C) Phylogeny of malate dehydrogenase (MDH) in KR01. Bootstrap support values >90 are shown at the branches. Well-supported clades with interest are marked with gradient color boxes. Color code: blue, *Paulinella* species; green, *Arabidopsis thaliana*; gray, bacteria and archaea species.

## Supplemental Data:

### Independent evolution of the thioredoxin system with diverse phylogenetic origins in photosynthetic *Paulinella* species

Duckhyun Lhee, Debashish Bhattacharya, Hwan Su Yoon

#### Supplementary Table

**Table S1.** Location and number of thioredoxin system-related genes and genes in the Calvin–Benson cycle (CB) and oxidative pentose phosphate pathway (OPPP) in different photosynthetic organisms (*Synechocystis* sp. PCC 6803, *Cyanidioschyzon merolae*, *Arabidopsis thaliana*, *Paulinella micropora* KR01).

|                       | Enzyme   | Cyanobacteria<br>( <i>Synechocystis</i> sp.<br>PCC 6803) | Red algae<br>( <i>Cyanidioschyzon merolae</i> ) |                    | Green plant<br>( <i>Arabidopsis thaliana</i> ) |                                                | <i>Paulinella micropora</i><br>KR01  |                    |
|-----------------------|----------|----------------------------------------------------------|-------------------------------------------------|--------------------|------------------------------------------------|------------------------------------------------|--------------------------------------|--------------------|
|                       |          |                                                          | Plastid genome                                  | Nuclear genome     | Chloroplast genome                             | Nuclear genome                                 | Chromatophore genome                 | Nuclear genome     |
| Thiol-oxidoreductase  | TRX      | 4                                                        | 1                                               | 7                  | -                                              | 20                                             | 2                                    | 9                  |
|                       | GRX      | 3                                                        | -                                               | 2                  | -                                              | 28                                             | 1                                    | 2                  |
| Thioredoxin reductase | FTR      | 2                                                        | 1 (catalytic chain)                             | 1 (variable chain) | -                                              | 3 (catalytic beta chain), 3 (variable subunit) | 2 (catalytic chain, variable chain)  | NA                 |
|                       | NTR      | 1                                                        | -                                               | 1                  | -                                              | 4                                              | 1                                    | 3                  |
| CB                    | Rubisco  | 1 (large subunit), 2 (small subunit)                     | 1 (large subunit), 1 (small subunit)            | -                  | 1 (large subunit)                              | 8 (small subunit)                              | 1 (large subunit), 1 (small subunit) | NA                 |
|                       | Actinase | -                                                        | -                                               | -                  | -                                              | 3                                              | NA                                   | NA                 |
|                       | PRK      | 1                                                        | -                                               | 1                  | -                                              | 1                                              | 1                                    | NA                 |
|                       | GAPDH    | 2                                                        | -                                               | 4                  | -                                              | 16                                             | 1                                    | 2                  |
|                       | CP12     | 1                                                        | -                                               | 1                  | -                                              | 3                                              | NA                                   | 1 (partial domain) |
|                       | F/SBPase | 1                                                        | -                                               | -                  | -                                              | -                                              | 1                                    | NA                 |
|                       | FBPase   | 1                                                        | -                                               | 2                  | -                                              | 2                                              | NA                                   | 1                  |
|                       | SBPase   | -                                                        | -                                               | 2                  | -                                              | 1                                              | NA                                   | NA                 |
|                       | MdH      | 1                                                        | -                                               | 2                  | -                                              | 7                                              | NA                                   | 4                  |
| OPPP                  | OpcA     | 1                                                        | -                                               | -                  | -                                              | -                                              | NA                                   | NA                 |
|                       | G6PDH    | 1                                                        | -                                               | 2                  | -                                              | 12                                             | NA                                   | 3                  |

#### Supplemental Experimental Procedures

##### Survey of genes in this paper.

In this study, we used data from *Paulinella micropora* KR01<sup>S1</sup>, *Paulinella chromatophora* CCAC 0185<sup>S2</sup>, and *Paulinella ovalis*<sup>S3</sup>. The chromatophore proteome data from *P. chromatophora* CCAC 0185<sup>S4</sup> was used to predict the location of proteins in KR01. The presence of a chromatophore transit peptide in KR01 proteins and

gene expression data under high light stress and the diurnal cycle provided corroborating data for reaching conclusions<sup>S1</sup>. To find thioredoxin system-related genes and genes in the Calvin–Benson cycle and oxidative pentose phosphate pathway in *Paulinella* species, the reference genes of *Arabidopsis thaliana* and *Synechocystis* sp. strain PCC 6803 were used as starting queries in BLASTp searches (e-value cutoff: 1e-5)<sup>S5</sup> against the *Paulinella* database. Domain structure was analyzed using the web-based CD-search<sup>S6</sup>. After manually checking the alignment, only genes that were well-aligned with conserved domains were selected for downstream analysis.

|       | Gene name | Encoded location     | <i>P. chromatophora</i> ortholog                               | Predicted location | DEG (p-value < 0.05 and  log2 (fold change)  > 1) | Chromatophore transit peptides | Diurnal rhythmic expression |
|-------|-----------|----------------------|----------------------------------------------------------------|--------------------|---------------------------------------------------|--------------------------------|-----------------------------|
| TRX   | g18255.t1 | Nuclear genome       | scaffold26240-size528 m.128845                                 | Lysate             |                                                   |                                |                             |
| TRX   | g28294.t1 | Nuclear genome       | scaffold7220-size1567 m.58497                                  | Lysate             |                                                   |                                |                             |
| TRX   | g35100.t1 | Nuclear genome       | scaffold8548-size1418 m.65412                                  | Chromatophore      |                                                   | crTP                           |                             |
| TRX   | g38191.t1 | Nuclear genome       | scaffold12955-size1047 m.85383                                 | Lysate             |                                                   |                                |                             |
| TRX   | g4155.t1  | Nuclear genome       | scaffold11899-size1123 m.80931                                 |                    |                                                   |                                |                             |
| TRX   | g41691.t1 | Nuclear genome       | scaffold15851-size878 m.96520                                  |                    |                                                   |                                |                             |
| TRX   | g63005.t1 | Nuclear genome       | scaffold7336-size1552 m.59121                                  |                    |                                                   |                                |                             |
| TRX   | g69762.t1 | Nuclear genome       | scaffold16773-size830 m.99823                                  |                    |                                                   |                                |                             |
| TRX   | g76893.t1 | Nuclear genome       | scaffold14993-size922 m.93369                                  |                    |                                                   |                                |                             |
| TRX   | PCKR_721  | Chromatophore genome | PCC_0738                                                       | Chromatophore      | NA                                                | NA                             | NA                          |
| TRX   | PCKR_755  | Chromatophore genome | PCC_0772                                                       | Chromatophore      | NA                                                | NA                             | NA                          |
| GRX   | g65652.t1 | Nuclear genome       | scaffold4665-size1929 m.43315                                  | Lysate             |                                                   |                                |                             |
| GRX   | g77183.t1 | Nuclear genome       | scaffold27528-size502 m.132296, scaffold24812-size560 m.124887 |                    |                                                   |                                | Diurnal                     |
| GRX   | PCKR_810  | Chromatophore genome | PCC_0826                                                       | Chromatophore      | NA                                                | NA                             | NA                          |
| NTR   | g2886.t1  | Nuclear genome       |                                                                |                    |                                                   |                                |                             |
| NTR   | g17500.t1 | Nuclear genome       |                                                                |                    |                                                   |                                |                             |
| NTR   | g3229.t1  | Nuclear genome       |                                                                |                    | TP06_UP                                           |                                |                             |
| NTR   | PCKR_028  | Chromatophore genome | PCC_0027                                                       | Chromatophore      | NA                                                | NA                             | NA                          |
| FTR   | PCKR_644  | Chromatophore genome | PCC_0658                                                       | Chromatophore      | NA                                                | NA                             | NA                          |
| FTR   | PCKR_213  | Chromatophore genome | PCC_0219                                                       | Chromatophore      | NA                                                | NA                             | NA                          |
| GAPDH | g28715.t1 | Nuclear genome       | scaffold4957-size1875 m.45177                                  | Lysate             |                                                   |                                |                             |
| GAPDH | g38229.t1 | Nuclear              | scaffold3834-                                                  | Lysate             |                                                   |                                |                             |

|        |           |                      |                                |               |                    |      |         |
|--------|-----------|----------------------|--------------------------------|---------------|--------------------|------|---------|
|        |           | genome               | size2088 m.37882               |               |                    |      |         |
| GAPDH  | PCKR_414  | Chromatophore genome | PCC_0418                       | Chromatophore | NA                 | NA   | NA      |
| MDH    | g8927.t1  | Nuclear genome       | scaffold6154-size1705 m.52479  | Chromatophore | TP06_UP, TP30_DOWN | crTP | Diurnal |
| MDH    | g43748.t1 | Nuclear genome       | scaffold9817-size1295 m.71516  | Lysate        | TP06_DOWN          |      |         |
| MDH    | g62328.t1 | Nuclear genome       | scaffold12090-size1110 m.81767 | Lysate        |                    |      |         |
| MDH    | g55981.t1 | Nuclear genome       | scaffold9817-size1295 m.71516  | Lysate        | TP06_UP            |      | Diurnal |
| CP12   | g65620.t1 | Nuclear genome       |                                |               |                    |      |         |
| FBPase | g72605.t1 | Nuclear genome       | scaffold7966-size1483 m.62430  | Lysate        | TP06_DOWN, TP18_UP |      |         |
| FBPase | PCKR_261  | Chromatophore genome | PCC0268                        | Chromatophore | NA                 | NA   | NA      |
| G6PDH  | g9229.t1  | Nuclear genome       | scaffold2155-size2616 m.25388  | Chromatophore |                    | crTP |         |
| G6PDH  | g40784.t1 | Nuclear genome       | scaffold2155-size2616 m.25388  | Chromatophore |                    | crTP | Diurnal |
| G6PDH  | g58255.t1 | Nuclear genome       | scaffold3969-size2060 m.38789  | Lysate        |                    |      |         |

### Phylogenetic analysis

Putative homologs for each target protein were identified using a BlastP search ( $e$ -value cutoff:  $1e-5$ )<sup>S5</sup> against a local database, which contained taxa selected from NCBI RefSeq<sup>S7</sup> and the MMETSP database<sup>S8</sup> to provide a broad taxon sampling. CD-HIT<sup>S9</sup> was used to remove the redundant isoforms. Multiple amino acid alignments were done using Clustal Omega<sup>S10</sup> with the default options. These alignments were refined manually based on conserved domains. Maximum likelihood-based phylogenetic analysis and bootstrap resampling of the data was done using IQ-TREE<sup>S11</sup> with 1,000 ultrafast bootstrap replications<sup>S12</sup>. The evolutionary model was automatically selected using the model test option incorporated in IQ-TREE. Highly diverged or contaminant sequences, which exhibited a long-branch or taxonomic misplacement in the tree were removed and the analysis done anew. ETE3<sup>S13</sup> was used to visualize the tree and alignments.

### Data Availability

Sequence alignments of phylogenetic trees are available from Dryad Digital Repository (<https://doi.org/10.5061/dryad.8kpr4xmt>).

### Supplemental References

- S1. Lhee, D., Lee, J., Ettahi, K., Cho, C.H., Ha, J.-S., Chan, Y.-F., Zelzion, U., Stephens, T.G., Price, D.C., Gabr, A., et al. (2020). Amoeba genome reveals dominant host contribution to plastid endosymbiosis. *Mol. Biol. Evol.*
- S2. Nowack, E.C.M., Price, D.C., Bhattacharya, D., Singer, A., Melkonian, M., and Grossman, A.R. (2016). Gene transfers from diverse bacteria compensate for reductive genome evolution in the chromatophore of *Paulinella chromatophora*. *Proc. Natl. Acad. Sci. U.S.A.* *113*, 12214-12219.
- S3. Bhattacharya, D., Price, D.C., Yoon, H.S., Yang, E.C., Poulton, N.J., Andersen, R.A., and Das, S.P. (2012). Single cell genome analysis supports a link between phagotrophy and primary plastid endosymbiosis. *Sci. Rep.* *2*, 356-356.
- S4. Singer, A., Poschmann, G., Muhlich, C., Valadez-Cano, C., Hansch, S., Huren, V., Rensing, S.A., Stuhler, K., and Nowack, E.C.M. (2017). Massive protein import into the early-evolutionary-stage photosynthetic organelle of the amoeba *Paulinella chromatophora*. *Curr. Biol.* *27*, 2763-2773 e2765.
- S5. Camacho, C., Coulouris, G., Avagyan, V., Ma, N., Papadopoulos, J., Bealer, K., and Madden, T.L. (2009). BLAST+: architecture and applications. *BMC Bioinformatics* *10*, 421-421.

- S6. Marchler-Bauer, A., Bo, Y., Han, L., He, J., Lanczycki, C.J., Lu, S., Chitsaz, F., Derbyshire, M.K., Geer, R.C., Gonzales, N.R., et al. (2017). CDD/SPARCLE: functional classification of proteins via subfamily domain architectures. *Nucleic Acids Res.* *45*, D200-D203.
- S7. O'Leary, N.A., Wright, M.W., Brister, J.R., Ciufo, S., Haddad, D., McVeigh, R., Rajput, B., Robbertse, B., Smith-White, B., Ako-Adjei, D., et al. (2016). Reference sequence (RefSeq) database at NCBI: current status, taxonomic expansion, and functional annotation. *Nucleic Acids Res.* *44*, D733-745.
- S8. Keeling, P.J., Burki, F., Wilcox, H.M., Allam, B., Allen, E.E., Amaral-Zettler, L.A., Armbrust, E.V., Archibald, J.M., Bharti, A.K., Bell, C.J., et al. (2014). The Marine Microbial Eukaryote Transcriptome Sequencing Project (MMETSP): illuminating the functional diversity of eukaryotic life in the oceans through transcriptome sequencing. *PLoS Biol.* *12*, e1001889-e1001889.
- S9. Fu, L., Niu, B., Zhu, Z., Wu, S., and Li, W. (2012). CD-HIT: accelerated for clustering the next-generation sequencing data. *Bioinformatics (Oxford, England)* *28*, 3150-3152.
- S10. Sievers, F., and Higgins, D.G. (2018). Clustal Omega for making accurate alignments of many protein sequences. *Protein Sci.* *27*, 135-145.
- S11. Nguyen, L.-T., Schmidt, H.A., von Haeseler, A., and Minh, B.Q. (2015). IQ-TREE: a fast and effective stochastic algorithm for estimating maximum-likelihood phylogenies. *Mol. Biol. Evol.* *32*, 268-274.
- S12. Minh, B.Q., Nguyen, M.A.T., and von Haeseler, A. (2013). Ultrafast approximation for phylogenetic bootstrap. *Mol. Biol. Evol.* *30*, 1188-1195.
- S13. Huerta-Cepas, J., Serra, F., and Bork, P. (2016). ETE 3: Reconstruction, analysis, and visualization of phylogenomic data. *Mol. Biol. Evol.* *33*, 1635-1638.



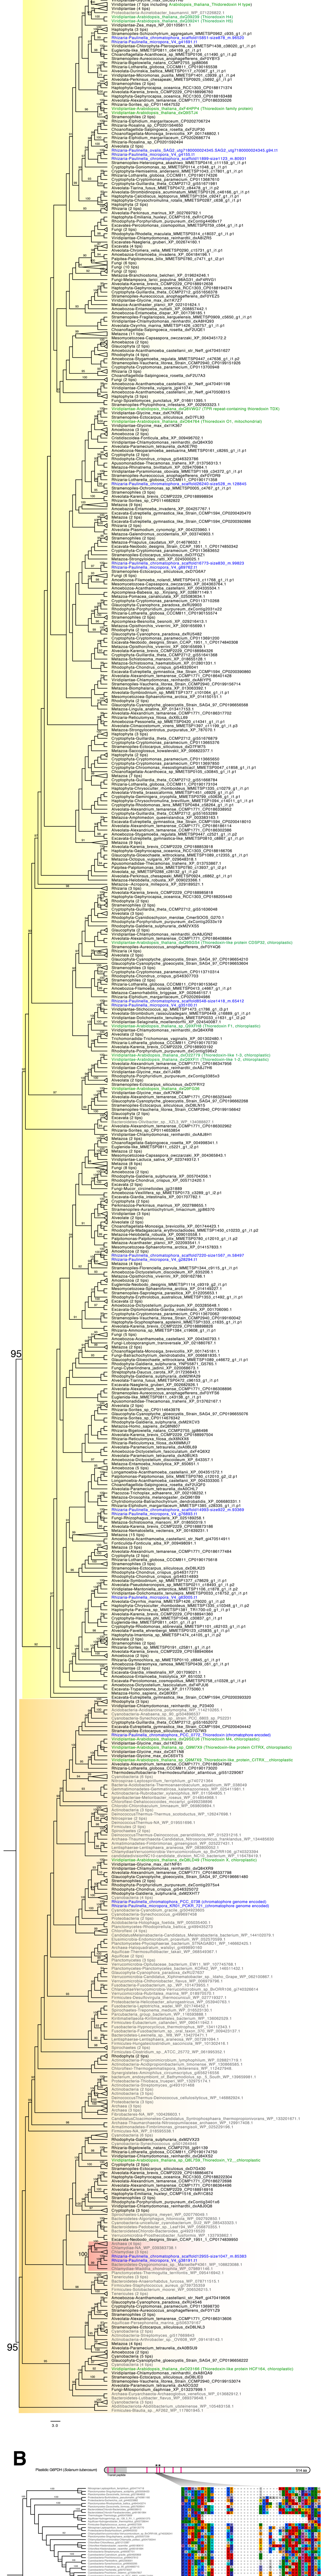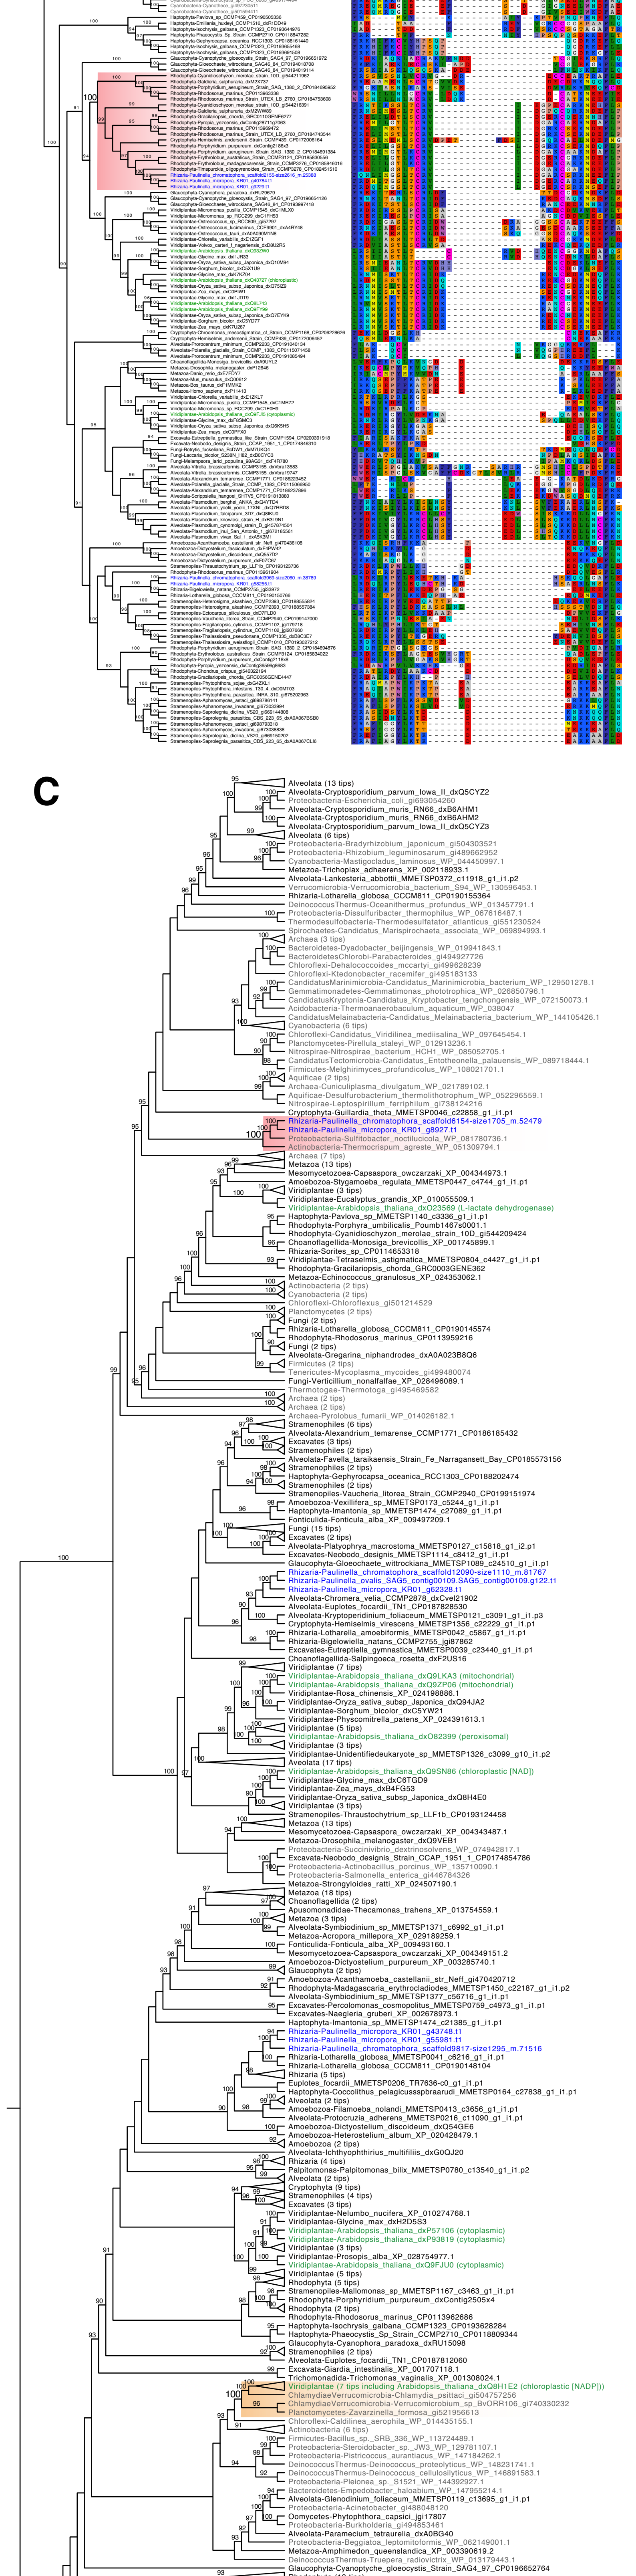

**B** Flavodoxin (Spirillum tuberosum)

514



**C**
